# Supplementary material
Source: Elsevier journal article supplement (https://www.sciencedirect.com/science/article/pii/S1413867015001981)
Supplement: mmc1 [file S1413867015001981:mmc1.doc]

| 1. **Influenza viral surveillance data** | | | | | | | | | | |  |
| --- | --- | --- | --- | --- | --- | --- | --- | --- | --- | --- | --- |
|  |  | **Influenza n (%)**‡ | | | | **Population** | | | | |  |
| **Type of study** | **A** | **A subtype** | **B** | **B subtype** | | **Age** | **Local** | | **Period** | |
| **Online articles** | | | | | | | | | | |  |
| Borborema *et al.* (2014) [32] | Outbreak investigation of respiratory illness | 0 (0%) | - | 7 (100%) | Victoria: 7 (100%)  Yamagata: 0 (0%) | Not specified. | | Cruise ship  Santos/SP | 2012 | |  |
| Coelho *et al.* (2007) | Retrospective, hospital-based study | 31 (68.9%) | - | 14 (31.1%) | - | ≤6 months (51.1%)  6–12 months (26.7%)  12–24 months (8,9%  ≥24 months (13.3%) | | Curitiba/PR | 1996–2001 | |  |
| Bellei *et al.* (2007) [30] | Acute Respiratory Infection etiology in a hospital setting | Proportion of Flu A/B among samples collected  2001 (42%)  2002 (18%)  2003 (13%)  Influenza A and B co-circulated at the same time in 2001 and 2002, with alternate predominance of types  In 2003, influenza B was not found. | | | | Outpatients aged ≥ 18 years  Any acute respiratory infection of possible viral etiology | | São Paulo/SP | 2001–2003 | |  |
| Silva, P. (2010) | Standardization of the protocol sequencing of the gene segment NA Influenza B viruses | Not applicable | - | 75 | 44 (59%) Victoria  31 (41%) Yamagata  2007: 2 Yamagata and 5 Victoria  2008: 17 Yamagata and 31 Victoria | Not specified  Clinical specimens from sentinel units | | Different Brazilian regions | 2004–2008 | |  |
| Freitas, FTM. (2013) | Descriptive study | 2000: 1 (100%)  2001: 11 (78.57%)  2002: 39 (54.17%)  2003: 89 (92.71%)  2004: 158 (87.29%)  2005: 94 (90.38%)  2006: 184 (78.97%)  2007: 229 (88.08%)  2008: 162 (60.45%)  2009: 504 (82.49%)  2010: 219 (52.52%) | - | 2000: 0 (0%)  2001: 3 (21.43%)  2002: 33 (45.83%)  2003: 7 (7.29%)  2004: 23 (12.71%)  2005: 10 (9.62%)  2006: 49 (21.03%)  2007: 31 (11.92%)  2008: 106 (39.55%)  2009: 107 (17.51%)  2010: 198 (47.48%) | - | All ages (Median age: 12 years)  Information system of sentinel units | | Different Brazilian regions | 2000–2010 | |  |
| Ribeiro *et al.* (2011) | Descriptive cross-sectional study | 7 (87.5%) | - | 1 (12.5%) | - | <5 years | | Instituto Fernandes Figueira/Fundação Oswaldo Cruz (IFF/FIOCRUZ) RJ | 2005–2006 | |  |
| Thomazelli *et al.* (2007) [40] | Prospective study | 17 (100%) | - | 0 (0%) | - | Hospitalized: <5 years  Range: 18d-4,6m | | Hospital Universitário, Universidade de São Paulo/SP | 2003 | |  |
| Vidal *et al.* (2008). [41] | Not specified by the authors | 103 (76.3%) | - | 32 (23.7%) | - | All ages | | General Hospital at the Federal University, Curitiba/PR | 2000–2003 | |  |
| Fernandes *et al.* (2014) | Outbreak investigation of respiratory illness. | - | - | 1 (100%) death influenza infection followed by Methicillin-Resistant *Staphylococcus Aureus* pneumonia  6 (60%) hospitalized  7 (100%) | Victoria: 7 (100%) | Not specified. | | Cruise ship  Santos/SP | 2012 | |  |
| Paiva *et al.* (2013) | Outbreak investigation | - | - | 5 (100%) | Victoria: 5 (100%) | All ages  Young children (aged 1–12 years) were the most affected  Incidence gradually decreasing with age. | | Araraquara/SP | 2002 | |  |
| Bellei *et al.* (2008) [31] | Prospective study | 49 (58,33%) | - | 35 (41.67%) | - | Outpatients ≥ 18 years | | Federal University of São Paulo Hospital/SP | 2001–2003 | |  |
| Carraro *et al.*(2014) [33] | Evaluation of diagnostic technique | 46 (58.98%) | - | 32 (41.02%) |  | 16-83 years | | Federal University of São Paulo Hospital/SP | 2001–2003 | |  |
| **Abstracts from Annals of Scientific Events** | | | | | | | | | | |  |
| Perosa, and Bellei (2013) |  | - | - | 105 | 96 subtyped  40(41,7%)  Yamagata  56 (58,3%) Victoria | All ages  Mean age: 23.9 years | | Tertiary hospital in SP | 2001–2003 | |  |
| Paiva *et al.* (2013) [43] |  | 1272 | 1214 (80%) A (H1N1) pdm09  58 (4%) A (H3) | 242 (16%) | Victoria | Not specified  Clinical specimens from sentinel units | | Different Brazilian regions | 2013 | |  |
| Oliveira *et al.* (2013) [42] |  | - | - | Not specified | 2008: South Victoria (n=23/28)  Northeast (n=3/6)  Southeast (n=6/15)  2010  Northeast Victoria (n=4/5)  Yamagata Southeast (n= 11/16)  South (n=11/11)  2012: Yamagata Northeast (n=4/9).  2013: Victoria (n=20/23) | Not specified  Clinical specimens from sentinel units | | Different Brazilian regions | 2000–2013 | |  |

‡Percentages are related to those positive for influenza; SP, São Paulo
